# Supplementary material
Source: PubMed Central journal article supplement (PMC3374670)
Supplement: supp_jn.111.155598_nut155598-SFig_1.pdf [file supp_jn.111.155598_nut155598-SFig_1.pdf]

Online Supporting Material

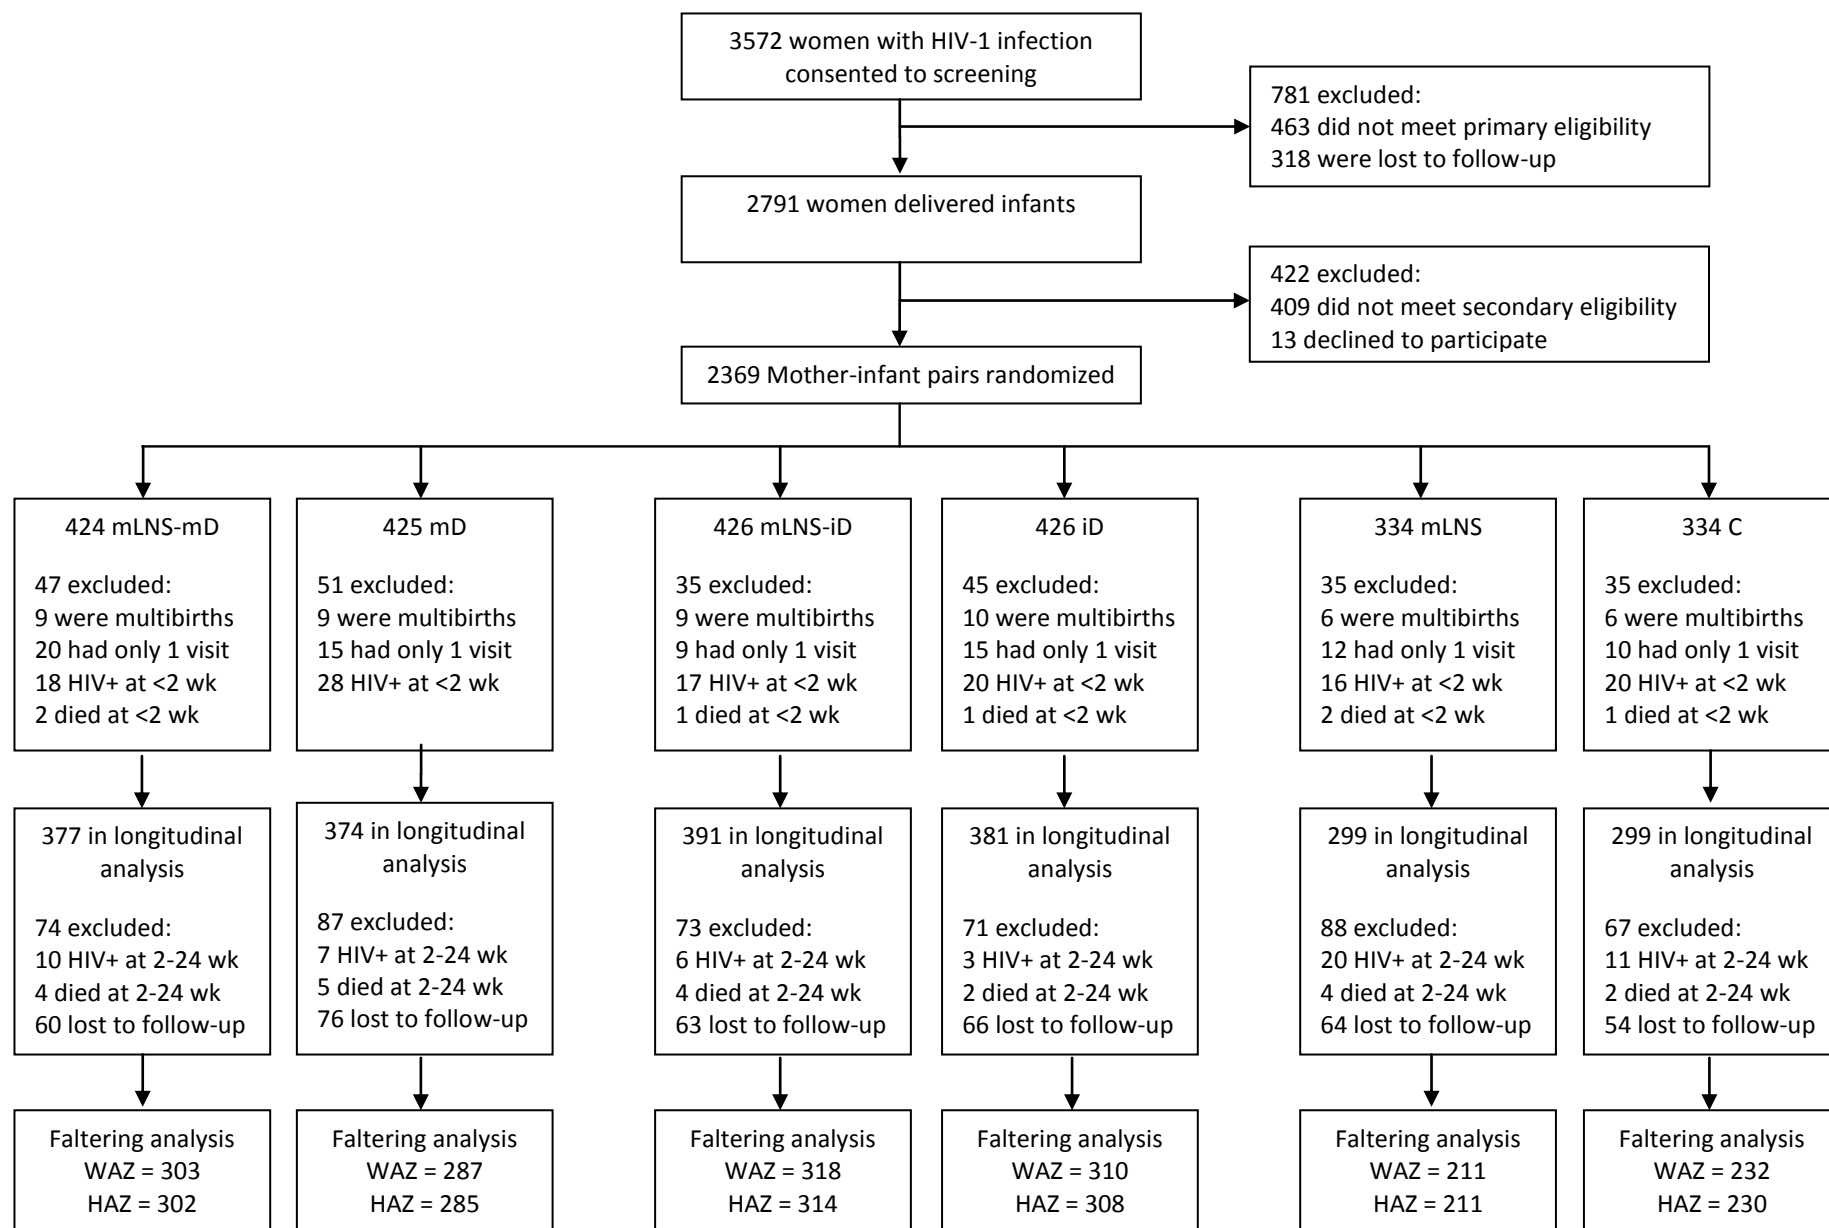

**Supplemental Figure 1.** Participants included in infant anthropometric analysis from 0-24 wk by study arm (C = control; iD = infant drug; mD = maternal drug; mLNS = maternal LNS; mLNS-iD = maternal LNS/infant drug; mLNS-mD = maternal LNS/maternal drug), excluded infants may be counted in more than one category (e.g. HIV+ and died)
