# Supplementary material
Source: PubMed Central journal article supplement (PMC3374670)
Supplement: supp_jn.111.155598_nut155598-ST1.pdf [file supp_jn.111.155598_nut155598-ST1.pdf]

**Supplemental Table 1: Mean weight, length, and BMI by study arm and sex at each study visit<sup>1,2</sup>**

| Mean weight, <i>kg</i> | Birth          | 1 wk          | 2 wk          | 4 wk          | 6 wk          | 8wk           | 12 wk         | 18 wk         | 21 wk         | 24 wk         |
|------------------------|----------------|---------------|---------------|---------------|---------------|---------------|---------------|---------------|---------------|---------------|
| BOYS                   | <i>n</i> =1071 | <i>n</i> =988 | <i>n</i> =986 | <i>n</i> =949 | <i>n</i> =942 | <i>n</i> =929 | <i>n</i> =932 | <i>n</i> =900 | <i>n</i> =874 | <i>n</i> =856 |
| C                      | 3.0 ± 0.4      | 3.2 ± 0.4     | 3.4 ± 0.5     | 4.1 ± 0.6     | 4.7 ± 0.6     | 5.2 ± 0.7     | 6.0 ± 0.8     | 6.9 ± 0.9     | 7.3 ± 1.0     | 7.5 ± 1.0     |
| mLNS                   | 3.2 ± 0.4      | 3.3 ± 0.4     | 3.5 ± 0.5     | 4.1 ± 0.5     | 4.7 ± 0.5     | 5.2 ± 0.6     | 6.0 ± 0.6     | 6.8 ± 0.7     | 7.2 ± 0.7     | 7.4 ± 0.7     |
| mARV                   | 3.1 ± 0.5      | 3.2 ± 0.5     | 3.4 ± 0.5     | 4.1 ± 0.5     | 4.6 ± 0.6     | 5.1 ± 0.6     | 5.8 ± 0.7     | 6.7 ± 0.8     | 7.1 ± 0.8     | 7.4 ± 0.9     |
| mLNS-mARV              | 3.1 ± 0.4      | 3.2 ± 0.4     | 3.5 ± 0.4     | 4.1 ± 0.5     | 4.7 ± 0.6     | 5.1 ± 0.6     | 5.9 ± 0.7     | 6.8 ± 0.8     | 7.2 ± 0.8     | 7.4 ± 0.8     |
| iARV                   | 3.1 ± 0.5      | 3.2 ± 0.4     | 3.5 ± 0.5     | 4.1 ± 0.6     | 4.7 ± 0.6     | 5.1 ± 0.6     | 5.9 ± 0.7     | 6.7 ± 0.8     | 7.1 ± 0.8     | 7.4 ± 0.9     |
| mLNS-iARV              | 3.0 ± 0.4      | 3.2 ± 0.4     | 3.4 ± 0.4     | 4.1 ± 0.5     | 4.6 ± 0.5     | 5.2 ± 0.6     | 5.9 ± 0.7     | 6.8 ± 0.8     | 7.1 ± 0.9     | 7.4 ± 0.9     |
| GIRLS                  | <i>n</i> =1050 | <i>n</i> =988 | <i>n</i> =956 | <i>n</i> =921 | <i>n</i> =887 | <i>n</i> =868 | <i>n</i> =874 | <i>n</i> =854 | <i>n</i> =833 | <i>n</i> =807 |
| C                      | 3.0 ± 0.4      | 3.1 ± 0.4     | 3.3 ± 0.5     | 3.8 ± 0.5     | 4.4 ± 0.5     | 4.8 ± 0.5     | 5.5 ± 0.6     | 6.3 ± 0.7     | 6.6 ± 0.7     | 6.8 ± 0.8     |
| mLNS                   | 2.9 ± 0.4      | 3.1 ± 0.4     | 3.3 ± 0.4     | 3.8 ± 0.5     | 4.3 ± 0.5     | 4.8 ± 0.6     | 5.5 ± 0.6     | 6.3 ± 0.8     | 6.6 ± 0.9     | 6.9 ± 1.0     |
| mARV                   | 3.0 ± 0.4      | 3.2 ± 0.4     | 3.3 ± 0.4     | 3.9 ± 0.4     | 4.4 ± 0.5     | 4.8 ± 0.6     | 5.6 ± 0.7     | 6.4 ± 0.8     | 6.7 ± 0.8     | 6.9 ± 0.8     |
| mLNS-mARV              | 3.0 ± 0.4      | 3.1 ± 0.4     | 3.4 ± 0.4     | 3.9 ± 0.6     | 4.4 ± 0.5     | 4.8 ± 0.6     | 5.5 ± 0.6     | 6.2 ± 0.7     | 6.5 ± 0.7     | 6.8 ± 0.8     |
| iARV                   | 3.0 ± 0.4      | 3.2 ± 0.4     | 3.4 ± 0.4     | 3.9 ± 0.5     | 4.4 ± 0.5     | 4.8 ± 0.5     | 5.5 ± 0.7     | 6.3 ± 0.8     | 6.6 ± 0.8     | 6.9 ± 0.9     |
| mLNS-iARV              | 3.0 ± 0.4      | 3.1 ± 0.4     | 3.3 ± 0.4     | 3.9 ± 0.5     | 4.4 ± 0.5     | 4.8 ± 0.5     | 5.5 ± 0.6     | 6.3 ± 0.8     | 6.6 ± 0.8     | 6.9 ± 0.8     |
| Mean length, <i>cm</i> | Birth          | 1 wk          | 2 wk          | 4 wk          | 6 wk          | 8wk           | 12 wk         | 18 wk         | 21 wk         | 24 wk         |
| BOYS                   | <i>n</i> =1060 | <i>n</i> =986 | <i>n</i> =986 | <i>n</i> =948 | <i>n</i> =942 | <i>n</i> =928 | <i>n</i> =932 | <i>n</i> =900 | <i>n</i> =873 | <i>n</i> =855 |
| C                      | 48.3 ± 2.0     | 50.0 ± 2.0    | 50.6 ± 2.3    | 52.7 ± 2.1    | 54.4 ± 2.2    | 56.3 ± 2.2    | 59.0 ± 2.5    | 62.2 ± 2.7    | 63.7 ± 2.7    | 64.7 ± 2.7    |
| mLNS                   | 48.8 ± 1.9     | 50.4 ± 2.0    | 51.2 ± 2.1    | 53.3 ± 2.1    | 55.0 ± 2.2    | 56.5 ± 2.2    | 59.3 ± 2.4    | 62.6 ± 2.4    | 63.8 ± 1.9    | 65.1 ± 2.2    |
| mARV                   | 48.5 ± 2.0     | 50.0 ± 2.2    | 50.7 ± 2.2    | 52.6 ± 2.2    | 54.5 ± 2.2    | 55.9 ± 2.2    | 58.9 ± 2.2    | 62.0 ± 1.9    | 63.2 ± 2.1    | 64.4 ± 2.2    |
| mLNS-mARV              | 48.6 ± 2.1     | 50.1 ± 2.2    | 50.6 ± 2.3    | 52.8 ± 2.2    | 54.5 ± 2.3    | 55.9 ± 2.4    | 58.9 ± 2.4    | 62.1 ± 2.4    | 63.4 ± 2.6    | 64.4 ± 2.4    |
| iARV                   | 48.6 ± 2.1     | 49.9 ± 1.8    | 50.7 ± 2.2    | 52.7 ± 2.2    | 54.7 ± 2.5    | 56.1 ± 2.3    | 58.9 ± 2.3    | 62.1 ± 2.5    | 63.6 ± 2.2    | 64.6 ± 2.4    |
| mLNS-iARV              | 48.4 ± 1.9     | 49.9 ± 1.9    | 50.6 ± 2.0    | 52.6 ± 2.0    | 54.4 ± 2.2    | 55.9 ± 2.1    | 58.9 ± 2.3    | 62.0 ± 2.3    | 63.4 ± 2.2    | 64.6 ± 2.3    |
| GIRLS                  | <i>n</i> =1045 | <i>n</i> =987 | <i>n</i> =956 | <i>n</i> =921 | <i>n</i> =887 | <i>n</i> =868 | <i>n</i> =874 | <i>n</i> =854 | <i>n</i> =833 | <i>n</i> =808 |
| C                      | 47.7 ± 1.6     | 49.2 ± 1.7    | 50.0 ± 2.1    | 51.8 ± 2.0    | 53.7 ± 2.1    | 55.3 ± 1.9    | 57.7 ± 1.8    | 60.7 ± 2.1    | 62.0 ± 2.2    | 63.2 ± 2.3    |
| mLNS                   | 47.7 ± 2.1     | 49.4 ± 2.1    | 50.2 ± 2.4    | 52.2 ± 2.4    | 53.8 ± 2.5    | 55.5 ± 2.4    | 58.1 ± 2.1    | 61.0 ± 2.5    | 62.4 ± 2.6    | 63.6 ± 2.8    |
| mARV                   | 48.0 ± 2.0     | 49.6 ± 2.0    | 49.9 ± 2.1    | 52.0 ± 2.2    | 53.8 ± 2.3    | 55.1 ± 2.4    | 57.9 ± 2.5    | 60.9 ± 2.3    | 62.3 ± 2.5    | 63.4 ± 2.4    |
| mLNS-mARV              | 48.0 ± 1.8     | 49.5 ± 1.9    | 50.2 ± 2.0    | 51.9 ± 1.9    | 53.7 ± 1.9    | 55.2 ± 2.2    | 57.8 ± 2.4    | 60.9 ± 2.3    | 62.2 ± 2.5    | 63.2 ± 2.5    |
| iARV                   | 48.0 ± 1.8     | 49.4 ± 1.8    | 50.1 ± 2.1    | 52.0 ± 2.2    | 53.8 ± 2.2    | 55.4 ± 2.3    | 57.9 ± 2.3    | 60.9 ± 2.2    | 62.1 ± 2.3    | 63.2 ± 2.3    |
| mLNS-iARV              | 47.9 ± 1.9     | 49.3 ± 1.9    | 50.0 ± 1.8    | 51.9 ± 2.0    | 53.5 ± 2.0    | 55.0 ± 2.0    | 57.8 ± 2.2    | 60.7 ± 2.1    | 61.9 ± 2.0    | 63.0 ± 2.3    |

Online Supporting Material

| Mean BMI, $kg/m^2$ | Birth          | 1 wk          | 2 wk          | 4 wk          | 6 wk          | 8wk           | 12 wk         | 18 wk         | 21 wk         | 24 wk         |
|--------------------|----------------|---------------|---------------|---------------|---------------|---------------|---------------|---------------|---------------|---------------|
| BOYS               | <i>n</i> =1059 | <i>n</i> =986 | <i>n</i> =986 | <i>n</i> =948 | <i>n</i> =942 | <i>n</i> =928 | <i>n</i> =932 | <i>n</i> =900 | <i>n</i> =873 | <i>n</i> =855 |
| C                  | 13.0 ± 1.4     | 12.8 ± 1.2    | 13.4 ± 1.4    | 14.7 ± 1.5    | 15.7 ± 1.4    | 16.3 ± 1.6    | 17.2 ± 1.8    | 17.9 ± 1.9    | 17.8 ± 1.7    | 17.8 ± 1.8    |
| mLNS               | 13.2 ± 1.3     | 12.8 ± 1.3    | 13.2 ± 1.4    | 14.4 ± 1.3    | 15.4 ± 1.4    | 16.2 ± 1.5    | 17.0 ± 1.5    | 17.4 ± 1.6    | 17.6 ± 1.5    | 17.6 ± 1.6    |
| mARV               | 13.0 ± 1.5     | 12.7 ± 1.3    | 13.4 ± 1.3    | 14.7 ± 1.4    | 15.5 ± 1.4    | 16.2 ± 1.5    | 16.9 ± 1.5    | 17.5 ± 1.8    | 17.7 ± 1.6    | 17.8 ± 1.6    |
| mLNS-mARV          | 13.0 ± 1.3     | 12.7 ± 1.2    | 13.4 ± 1.3    | 14.7 ± 1.3    | 15.7 ± 1.4    | 16.3 ± 1.4    | 17.0 ± 1.5    | 17.5 ± 1.6    | 17.8 ± 1.7    | 17.8 ± 1.5    |
| iARV               | 13.1 ± 1.5     | 12.9 ± 1.3    | 13.4 ± 1.5    | 14.7 ± 1.5    | 15.5 ± 1.6    | 16.2 ± 1.5    | 17.0 ± 1.5    | 17.5 ± 1.7    | 17.5 ± 1.6    | 17.6 ± 1.9    |
| mLNS-iARV          | 12.9 ± 1.2     | 12.8 ± 1.2    | 13.4 ± 1.2    | 14.6 ± 1.3    | 15.6 ± 1.3    | 16.5 ± 1.5    | 17.1 ± 1.7    | 17.7 ± 1.7    | 17.7 ± 1.8    | 17.8 ± 1.8    |
| GIRLS              | <i>n</i> =1044 | <i>n</i> =987 | <i>n</i> =956 | <i>n</i> =921 | <i>n</i> =887 | <i>n</i> =868 | <i>n</i> =874 | <i>n</i> =854 | <i>n</i> =833 | <i>n</i> =807 |
| C                  | 13.1 ± 1.4     | 12.8 ± 1.4    | 13.3 ± 1.6    | 14.3 ± 1.5    | 15.1 ± 1.5    | 15.7 ± 1.5    | 16.5 ± 1.6    | 17.1 ± 1.5    | 17.2 ± 1.6    | 17.1 ± 1.8    |
| mLNS               | 12.9 ± 1.3     | 12.6 ± 1.2    | 12.9 ± 1.1    | 14.1 ± 1.2    | 14.9 ± 1.3    | 15.4 ± 1.4    | 16.2 ± 1.6    | 16.8 ± 1.8    | 17.0 ± 1.8    | 17.1 ± 1.6    |
| mARV               | 13.0 ± 1.3     | 12.8 ± 1.3    | 13.3 ± 1.2    | 14.5 ± 1.3    | 15.1 ± 1.5    | 15.8 ± 1.6    | 16.7 ± 1.6    | 17.1 ± 1.6    | 17.2 ± 1.6    | 17.2 ± 1.7    |
| mLNS-mARV          | 12.9 ± 1.4     | 12.7 ± 1.1    | 13.3 ± 1.2    | 14.5 ± 1.9    | 15.2 ± 1.3    | 15.6 ± 1.4    | 16.4 ± 1.5    | 16.8 ± 1.5    | 16.9 ± 1.5    | 17.1 ± 1.7    |
| iARV               | 12.9 ± 1.3     | 12.9 ± 1.2    | 13.3 ± 1.2    | 14.4 ± 1.2    | 15.2 ± 1.3    | 15.8 ± 1.6    | 16.5 ± 1.5    | 17.1 ± 1.8    | 17.1 ± 1.8    | 17.2 ± 1.8    |
| mLNS-iARV          | 13.0 ± 1.3     | 12.6 ± 1.3    | 13.2 ± 1.3    | 14.3 ± 1.3    | 15.2 ± 1.4    | 15.8 ± 1.5    | 16.5 ± 1.7    | 17.0 ± 1.7    | 17.2 ± 1.7    | 17.2 ± 1.7    |

<sup>1</sup>C = control; iARV = infant ARV; mARV = maternal ARV; mLNS = maternal LNS; mLNS-iARV = maternal LNS/infant ARV; mLNS-mARV = maternal LNS/maternal ARV

<sup>2</sup>Values are mean ± SD.
