# Supplementary material
Source: PubMed Central journal article supplement (PMC3374670)
Supplement: supp_jn.111.155598_nut155598-ST2.pdf [file supp_jn.111.155598_nut155598-ST2.pdf]

Online Supporting Material

**Supplemental Table 2:** Sex-stratified longitudinal random effects models showing the effects of study arms over time on growth outcomes (weight, length, and BMI) among BAN infants<sup>1,2</sup>

|                               | Weight <sup>3</sup> , kg |                 |         | Length, cm     |                |         | BMI, kg/m <sup>2</sup> |                 |         |
|-------------------------------|--------------------------|-----------------|---------|----------------|----------------|---------|------------------------|-----------------|---------|
|                               | Coef.                    | 95% CI          | P-value | Coef.          | 95% CI         | P-value | Coef.                  | 95% CI          | P-value |
| <b>BOYS<sup>4</sup></b>       | <i>n</i> =1071           |                 |         | <i>n</i> =1060 |                |         | <i>n</i> =1059         |                 |         |
| Anthropometric value at birth | 0.92                     | (0.86, 0.98)    | <0.001  | 0.65           | (0.61, 0.69)   | <0.001  | 0.35                   | (0.31, 0.40)    | <0.001  |
| Age (months)                  | 1.44                     | (1.40, 1.49)    | <0.001  | 4.34           | (4.28, 4.41)   | <0.001  | 2.65                   | (2.51, 2.79)    | <0.001  |
| Age <sup>2</sup> (months)     | -0.11                    | (-0.12, -0.10)  | <0.001  | -0.28          | (-0.29, -0.26) | <0.001  | -0.31                  | (-0.33, -0.28)  | <0.001  |
| mLNS                          | -0.04                    | (-0.15, 0.07)   | 0.48    | 0.12           | (-0.18, 0.42)  | 0.43    | -0.15                  | (-0.46, 0.15)   | 0.34    |
| mARV                          | 0.03                     | (-0.08, 0.14)   | 0.59    | -0.22          | (-0.50, 0.06)  | 0.13    | 0.10                   | (-0.18, 0.39)   | 0.49    |
| mLNS-mARV                     | 0.02                     | (-0.09, 0.12)   | 0.76    | -0.15          | (-0.43, 0.13)  | 0.30    | 0.05                   | (-0.24, 0.33)   | 0.75    |
| iARV                          | 0.03                     | (-0.08, 0.13)   | 0.64    | -0.12          | (-0.40, 0.17)  | 0.42    | 0.15                   | (-0.13, 0.44)   | 0.30    |
| mLNS-iARV                     | 0.02                     | (-0.08, 0.13)   | 0.66    | -0.14          | (-0.42, 0.14)  | 0.32    | 0.05                   | (-0.23, 0.33)   | 0.73    |
| mLNS*age                      | -0.03                    | (-0.09, 0.04)   | 0.43    |                |                |         | -0.06                  | (-0.26, 0.14)   | 0.56    |
| mARV*age                      | -0.11                    | (-0.17, -0.05)  | <0.001  |                |                |         | -0.29                  | (-0.47, -0.10)  | 0.003   |
| mLNS-mARV*age                 | -0.06                    | (-0.12, 0.00)   | 0.048   |                |                |         | -0.11                  | (-0.30, 0.07)   | 0.23    |
| iARV*age                      | -0.09                    | (-0.16, -0.03)  | 0.002   |                |                |         | -0.27                  | (-0.46, -0.08)  | 0.005   |
| mLNS-iARV*age                 | -0.05                    | (-0.11, 0.01)   | 0.12    |                |                |         | -0.08                  | (-0.27, 0.10)   | 0.37    |
| mLNS*age <sup>2</sup>         | 0.002                    | (-0.009, 0.013) | 0.76    |                |                |         | 0.009                  | (-0.026, 0.044) | 0.62    |
| mARV*age <sup>2</sup>         | 0.014                    | (0.004, 0.025)  | 0.006   |                |                |         | 0.047                  | (0.014, 0.079)  | 0.004   |
| mLNS-mARV*age <sup>2</sup>    | 0.006                    | (0.004, 0.016)  | 0.26    |                |                |         | 0.015                  | (-0.017, 0.047) | 0.36    |
| iARV*age <sup>2</sup>         | 0.010                    | (-0.001, 0.020) | 0.07    |                |                |         | 0.034                  | (0.002, 0.067)  | 0.037   |
| mLNS-iARV*age <sup>2</sup>    | 0.006                    | (-0.004, 0.016) | 0.26    |                |                |         | 0.011                  | (-0.021, 0.043) | 0.50    |
| <b>GIRLS<sup>5</sup></b>      | <i>n</i> =1050           |                 |         | <i>n</i> =1045 |                |         | <i>n</i> =1044         |                 |         |
| Anthropometric value at birth | 0.88                     | (0.82, 0.94)    | <0.001  | 0.68           | (0.64, 0.72)   | <0.001  | 0.38                   | (0.33, 0.43)    | <0.001  |
| Age (months)                  | 1.23                     | (1.18, 1.28)    | <0.001  | 4.11           | (4.04, 4.18)   | <0.001  | 2.21                   | (2.06, 2.36)    | <0.001  |
| Age <sup>2</sup> (months)     | -0.09                    | (-0.10, -0.08)  | <0.001  | -0.26          | (-0.27, -0.25) | <0.001  | -0.25                  | (-0.27, -0.22)  | <0.001  |
| mLNS                          | 0.01                     | (-0.10, 0.12)   | 0.82    | 0.16           | (-0.14, 0.46)  | 0.29    | -0.20                  | (-0.51, 0.11)   | 0.21    |
| mARV                          | 0.02                     | (-0.09, 0.12)   | 0.75    | -0.19          | (-0.48, 0.09)  | 0.18    | 0.03                   | (-0.26, 0.33)   | 0.83    |

## Online Supporting Material

|                            |       |                 |       |       |               |      |        |                 |      |
|----------------------------|-------|-----------------|-------|-------|---------------|------|--------|-----------------|------|
| mLNS-mARV                  | 0.07  | (-0.04, 0.17)   | 0.21  | -0.14 | (-0.43, 0.14) | 0.32 | 0.11   | (-0.18, 0.40)   | 0.46 |
| iARV                       | 0.06  | (-0.04, 0.16)   | 0.26  | -0.16 | (-0.44, 0.13) | 0.28 | 0.19   | (-0.10, 0.48)   | 0.19 |
| mLNS-iARV                  | -0.02 | (-0.12, 0.09)   | 0.74  | -0.25 | (-0.53, 0.03) | 0.08 | -0.11  | (-0.40, 0.18)   | 0.44 |
| mLNS*age                   | -0.04 | (-0.11, 0.02)   | 0.21  |       |               |      | -0.08  | (-0.29, 0.12)   | 0.43 |
| mARV*age                   | -0.02 | (-0.08, 0.05)   | 0.61  |       |               |      | 0.00   | (-0.20, 0.20)   | 0.99 |
| mLNS-mARV*age              | -0.06 | (-0.13, 0.00)   | 0.043 |       |               |      | -0.14  | (-0.34, 0.05)   | 0.15 |
| iARV*age                   | -0.03 | (-0.09, 0.03)   | 0.40  |       |               |      | -0.13  | (-0.32, 0.07)   | 0.20 |
| mLNS-iARV*age              | -0.01 | (-0.07, 0.05)   | 0.72  |       |               |      | 0.05   | (-0.14, 0.24)   | 0.59 |
| mLNS*age <sup>2</sup>      | 0.009 | (-0.002, 0.020) | 0.12  |       |               |      | 0.018  | (-0.018, 0.054) | 0.33 |
| mARV*age <sup>2</sup>      | 0.002 | (-0.009, 0.013) | 0.73  |       |               |      | -0.003 | (-0.037, 0.01)  | 0.88 |
| mLNS-mARV*age <sup>2</sup> | 0.007 | (-0.004, 0.018) | 0.19  |       |               |      | 0.015  | (-0.018, 0.049) | 0.38 |
| iARV*age <sup>2</sup>      | 0.002 | (-0.008, 0.013) | 0.66  |       |               |      | 0.018  | (-0.016, 0.051) | 0.30 |
| mLNS-iARV*age <sup>2</sup> | 0.000 | (-0.010, 0.011) | 0.94  |       |               |      | -0.008 | (-0.041, 0.025) | 0.62 |

<sup>1</sup>iARV = infant ARV; mARV = maternal ARV; mLNS = maternal LNS; mLNS-iARV = maternal LNS/infant ARV; mLNS-mARV = maternal LNS/maternal ARV

<sup>2</sup>Columns represent growth outcomes (weight, length, and BMI) and rows are covariates included in the model. For continuous covariates (such as age), the coefficients are slopes, while for indicator variables (such as mLNS), the coefficients are intercepts. The control arm (C) was used as the reference in all models.

<sup>3</sup>One boy and one girl were dropped from the weight analysis because they were missing birth weights.

<sup>4</sup>In boys, there was a significant overall interaction of the interventions with age and age-squared for weight ( $P < 0.001$ ) and BMI ( $p < 0.01$ ).

<sup>5</sup>In girls, there was a significant overall interaction of the interventions with age and age-squared for weight ( $P < 0.01$ ) and BMI ( $P < 0.05$ ).
